# Supplementary material for: Photosynthetic Responses of Canola to Exogenous Application or Endogenous Overproduction of 5-Aminolevulinic Acid (ALA) under Various Nitrogen Levels
Source: PubMed Central journal article supplement (PMC7690814; doi:10.3390/plants9111419), 2020-10-23
Supplement: plants-09-01419-s001.pdf [file plants-09-01419-s001.pdf]

Supplementary Materials

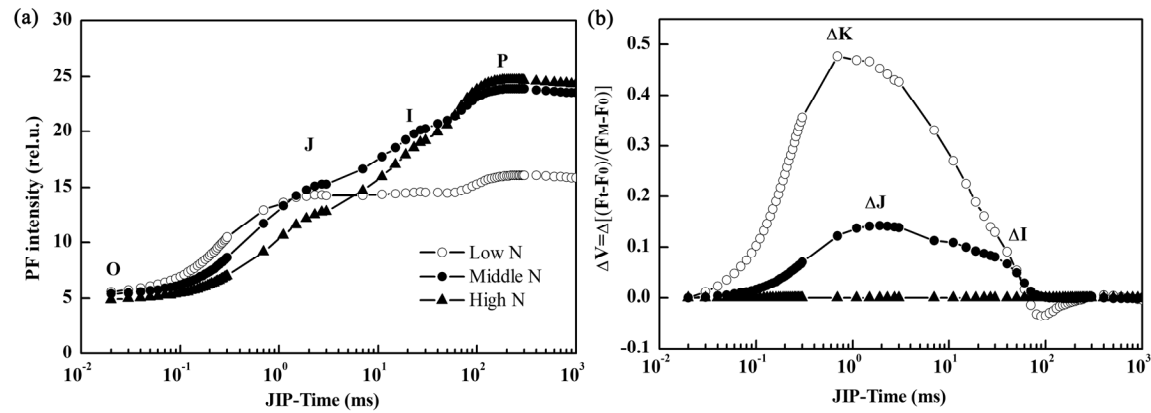

Figure S1. Changes in prompt fluorescence (PF, a) and the variable fluorescence curves ( $\Delta V$ , b) of canola leaves under low, middle, and high nitrogen levels.

Table S1. Correlation analysis for leaf Chl content, gas exchange and the considered PF and MR parameters.

|                                | Chl content | P <sub>n</sub> | G <sub>s</sub> | Tr      | Ci      | F <sub>o</sub> | F <sub>m</sub> | F <sub>v</sub> /F <sub>m</sub> | RC/CS <sub>o</sub> | M <sub>o</sub> | RC/ABS | ET <sub>o</sub> /RC | RE <sub>o</sub> /RC | φ <sub>Po</sub> | ψ <sub>Eo</sub> | φ <sub>Eo</sub> | δ <sub>Ro</sub> | φ <sub>Ro</sub> | PI <sub>ABS</sub> | PI <sub>total</sub> | V <sub>ox</sub> | V <sub>red</sub> |  |
|--------------------------------|-------------|----------------|----------------|---------|---------|----------------|----------------|--------------------------------|--------------------|----------------|--------|---------------------|---------------------|-----------------|-----------------|-----------------|-----------------|-----------------|-------------------|---------------------|-----------------|------------------|--|
| Chl content                    | 1.00        |                |                |         |         |                |                |                                |                    |                |        |                     |                     |                 |                 |                 |                 |                 |                   |                     |                 |                  |  |
| P <sub>n</sub>                 | 0.96**      | 1.00           |                |         |         |                |                |                                |                    |                |        |                     |                     |                 |                 |                 |                 |                 |                   |                     |                 |                  |  |
| G <sub>s</sub>                 | 0.91**      | 0.92**         | 1.00           |         |         |                |                |                                |                    |                |        |                     |                     |                 |                 |                 |                 |                 |                   |                     |                 |                  |  |
| Tr                             | 0.76*       | 0.84**         | 0.78*          | 1.00    |         |                |                |                                |                    |                |        |                     |                     |                 |                 |                 |                 |                 |                   |                     |                 |                  |  |
| Ci                             | -0.96**     | -0.92**        | -0.93**        | -0.81** | 1.00    |                |                |                                |                    |                |        |                     |                     |                 |                 |                 |                 |                 |                   |                     |                 |                  |  |
| F <sub>o</sub>                 | -0.60       | -0.68*         | -0.39          | -0.43   | 0.49    | 1.00           |                |                                |                    |                |        |                     |                     |                 |                 |                 |                 |                 |                   |                     |                 |                  |  |
| F <sub>m</sub>                 | 0.90**      | 0.89**         | 0.84**         | 0.79*   | -0.89** | -0.48          | 1.00           |                                |                    |                |        |                     |                     |                 |                 |                 |                 |                 |                   |                     |                 |                  |  |
| F <sub>v</sub> /F <sub>m</sub> | 0.91**      | 0.90**         | 0.77*          | 0.76*   | -0.85** | -0.67*         | 0.96**         | 1.00                           |                    |                |        |                     |                     |                 |                 |                 |                 |                 |                   |                     |                 |                  |  |
| RC/CS <sub>o</sub>             | 0.89**      | 0.90**         | 0.84**         | 0.83**  | -0.89** | -0.51          | 0.99**         | 0.96**                         | 1.00               |                |        |                     |                     |                 |                 |                 |                 |                 |                   |                     |                 |                  |  |
| M <sub>o</sub>                 | -0.90**     | -0.91**        | -0.80*         | -0.78*  | 0.86**  | 0.62           | -0.97**        | -0.99**                        | -0.98**            | 1.00           |        |                     |                     |                 |                 |                 |                 |                 |                   |                     |                 |                  |  |
| RC/ABS                         | 0.91**      | 0.95**         | 0.81**         | 0.80**  | -0.87** | -0.73*         | 0.94**         | 0.98**                         | 0.96**             | -0.98**        | 1.00   |                     |                     |                 |                 |                 |                 |                 |                   |                     |                 |                  |  |
| ET <sub>o</sub> /RC            | 0.91**      | 0.91**         | 0.78*          | 0.74*   | -0.85** | -0.68*         | 0.96**         | 0.99**                         | 0.96**             | -0.99**        | 0.98** | 1.00                |                     |                 |                 |                 |                 |                 |                   |                     |                 |                  |  |
| RE <sub>o</sub> /RC            | 0.61        | 0.65           | 0.55           | 0.40    | -0.51   | -0.63          | 0.33           | 0.38                           | 0.33               | -0.34          | 0.48   | 0.39                | 1.00                |                 |                 |                 |                 |                 |                   |                     |                 |                  |  |
| φ <sub>Po</sub>                | 0.91**      | 0.90**         | 0.77*          | 0.76*   | -0.85** | -0.67*         | 0.96**         | 1.00                           | 0.96**             | -0.99**        | 0.98** | 0.99**              | 0.38                | 1.00            |                 |                 |                 |                 |                   |                     |                 |                  |  |
| ψ <sub>Eo</sub>                | 0.92**      | 0.95**         | 0.80**         | 0.79*   | -0.87** | -0.76*         | 0.93**         | 0.98**                         | 0.95**             | -0.97**        | 0.99** | 0.98**              | 0.51                | 0.98**          | 1.00            |                 |                 |                 |                   |                     |                 |                  |  |
| φ <sub>Eo</sub>                | 0.92**      | 0.95**         | 0.80**         | 0.78*   | -0.87** | -0.77*         | 0.93**         | 0.98**                         | 0.94**             | -0.96**        | 0.99** | 0.98**              | 0.53                | 0.98**          | 0.99**          | 1.00            |                 |                 |                   |                     |                 |                  |  |
| δ <sub>Ro</sub>                | -0.58       | -0.54          | -0.49          | -0.54   | 0.58    | 0.24           | -0.79*         | -0.79*                         | -0.80*             | 0.82**         | -0.70* | -0.79*              | 0.24                | -0.79*          | -0.68*          | -0.66           | 1.00            |                 |                   |                     |                 |                  |  |
| φ <sub>Ro</sub>                | 0.93**      | 0.96**         | 0.83**         | 0.75*   | -0.85** | -0.76*         | 0.82**         | 0.86**                         | 0.82**             | -0.84**        | 0.91** | 0.86**              | 0.79                | 0.86**          | 0.92**          | 0.93**          | -0.39           | 1.00            |                   |                     |                 |                  |  |
| PI <sub>ABS</sub>              | 0.90**      | 0.94**         | 0.77*          | 0.75*   | -0.84** | -0.84**        | 0.79*          | 0.85**                         | 0.80*              | -0.82**        | 0.92** | 0.86**              | 0.75*               | 0.85**          | 0.93**          | 0.94**          | -0.38           | 0.97**          | 1.00              |                     |                 |                  |  |
| PI <sub>total</sub>            | 0.88**      | 0.92**         | 0.76*          | 0.76*   | -0.81** | -0.82**        | 0.74*          | 0.80**                         | 0.75*              | -0.77*         | 0.87** | 0.80**              | 0.81**              | 0.80**          | 0.89**          | 0.90**          | -0.29           | 0.97**          | 0.99**            | 1.00                |                 |                  |  |
| V <sub>ox</sub>                | 0.92**      | 0.94**         | 0.79*          | 0.75*   | -0.83** | -0.78*         | 0.76*          | 0.82**                         | 0.76*              | -0.80*         | 0.87** | 0.83**              | 0.81**              | 0.82**          | 0.89**          | 0.90**          | -0.35           | 0.98**          | 0.96**            | 0.98**              | 1.00            |                  |  |
| V <sub>red</sub>               | 0.98**      | 0.97**         | 0.93**         | 0.85**  | -0.97** | -0.60          | 0.91**         | 0.89**                         | 0.91**             | -0.89**        | 0.92** | 0.89**              | 0.62                | 0.89**          | 0.93**          | 0.93**          | -0.54           | 0.94**          | 0.92**            | 0.91**              | 0.92**          | 1.00             |  |

\*. Correlation is significant at the 0.05 level (2-tailed).

\*\* . Correlation is significant at the 0.01 level (2-tailed).

Table S2. The mean  $\pm$  SE and statistical tests for the JIP-test parameters of each treatment group

| JIP-test parameter | Low N              |                    |                    | Middle N           |                    |                    | High N              |                    |                    |
|--------------------|--------------------|--------------------|--------------------|--------------------|--------------------|--------------------|---------------------|--------------------|--------------------|
|                    | Control            | Exogenous ALA      | Endogenous ALA     | Control            | Exogenous ALA      | Endogenous ALA     | Control             | Exogenous ALA      | Endogenous ALA     |
| $F_o$              | 5567.67 $\pm$      | 5562.33 $\pm$      | 6143.33 $\pm$      | 5327.67 $\pm$      | 5227.33 $\pm$      | 5212.67 $\pm$      | 4869.00 $\pm$       | 4861.67 $\pm$      | 4850.00 $\pm$      |
|                    | 49.63 b            | 116.88 b           | 219.25 a           | 163.34 bc          | 45.94 bc           | 133.37 bc          | 162.45 c            | 133.14 c           | 384.03 c           |
| $F_m$              | 16079.67 $\pm$     | 21756.67 $\pm$     | 23799.33 $\pm$     | 23715.67 $\pm$     | 26391.33 $\pm$     | 26900.00 $\pm$     | 24711.33 $\pm$      | 26566.33 $\pm$     | 26190.33 $\pm$     |
|                    | 1004.98 d          | 814.22 c           | 1112.10 bc         | 1018.08 bc         | 959.75 ab          | 773.07 a           | 967.60 ab           | 1057.50 ab         | 274.17 ab          |
| $F_v/F_m$          | 0.65 $\pm$ 0.01 c  | 0.74 $\pm$ 0.00 b  | 0.74 $\pm$ 0.03 b  | 0.78 $\pm$ 0.01 ab | 0.80 $\pm$ 0.02 a  | 0.81 $\pm$ 0.01 a  | 0.81 $\pm$ 0.01 a   | 0.82 $\pm$ 0.01 a  | 0.82 $\pm$ 0.01 a  |
| $RC/CS_o$          | 0.29 $\pm$ 0.01 f  | 0.48 $\pm$ 0.02 e  | 0.49 $\pm$ 0.01 e  | 0.55 $\pm$ 0.02 d  | 0.67 $\pm$ 0.02 c  | 0.68 $\pm$ 0.01 c  | 0.68 $\pm$ 0.02 bc  | 0.73 $\pm$ 0.02 a  | 0.72 $\pm$ 0.01 ab |
| $M_o$              | 1607.08 $\pm$      | 2620.41 $\pm$      | 2945.45 $\pm$      | 2954.89 $\pm$      | 3600.24 $\pm$      | 3582.45 $\pm$      | 3228.70 $\pm$       | 3511.92 $\pm$      | 3454.57 $\pm$      |
|                    | 65.86 e            | 39.01 d            | 145.68 c           | 63.78 c            | 63.94 a            | 15.58 a            | 117.83 b            | 86.38 a            | 72.28 ab           |
| $RC/ABS$           | 1.87 $\pm$ 0.03 a  | 0.91 $\pm$ 0.02 b  | 0.93 $\pm$ 0.01 b  | 0.70 $\pm$ 0.01 c  | 0.44 $\pm$ 0.01 d  | 0.38 $\pm$ 0.03 de | 0.44 $\pm$ 0.01 d   | 0.33 $\pm$ 0.02 e  | 0.34 $\pm$ 0.01 e  |
| $ET_o/RC$          | 0.41 $\pm$ 0.01 f  | 0.62 $\pm$ 0.01 e  | 0.60 $\pm$ 0.01 e  | 0.70 $\pm$ 0.02 d  | 0.74 $\pm$ 0.00 c  | 0.78 $\pm$ 0.02 ab | 0.74 $\pm$ 0.02 bc  | 0.79 $\pm$ 0.01 a  | 0.80 $\pm$ 0.01 a  |
| $RE_o/RC$          | 0.34 $\pm$ 0.01 bc | 0.30 $\pm$ 0.00 de | 0.30 $\pm$ 0.01 de | 0.28 $\pm$ 0.00 e  | 0.35 $\pm$ 0.01 bc | 0.33 $\pm$ 0.01 cd | 0.33 $\pm$ 0.00 cd  | 0.37 $\pm$ 0.02 b  | 0.44 $\pm$ 0.02 a  |
| $\varphi_{Po}$     | 0.65 $\pm$ 0.01 c  | 0.74 $\pm$ 0.00 b  | 0.74 $\pm$ 0.03 b  | 0.78 $\pm$ 0.01 ab | 0.80 $\pm$ 0.02 a  | 0.81 $\pm$ 0.01 a  | 0.81 $\pm$ 0.01 a   | 0.82 $\pm$ 0.01 a  | 0.82 $\pm$ 0.01 a  |
| $\psi_{Eo}$        | 0.18 $\pm$ 0.02 e  | 0.41 $\pm$ 0.01 d  | 0.38 $\pm$ 0.01 d  | 0.48 $\pm$ 0.02 c  | 0.63 $\pm$ 0.03 b  | 0.66 $\pm$ 0.01 b  | 0.65 $\pm$ 0.02 b   | 0.71 $\pm$ 0.01 a  | 0.73 $\pm$ 0.01 a  |
| $\varphi_{Eo}$     | 0.12 $\pm$ 0.02 e  | 0.31 $\pm$ 0.01 d  | 0.30 $\pm$ 0.01 d  | 0.38 $\pm$ 0.05 c  | 0.50 $\pm$ 0.04 b  | 0.54 $\pm$ 0.00 ab | 0.52 $\pm$ 0.01 b   | 0.59 $\pm$ 0.00 a  | 0.59 $\pm$ 0.00 a  |
| $\delta_{Ro}$      | 0.84 $\pm$ 0.01 a  | 0.47 $\pm$ 0.02 cd | 0.51 $\pm$ 0.01 bc | 0.40 $\pm$ 0.01 f  | 0.46 $\pm$ 0.01 de | 0.42 $\pm$ 0.00 ef | 0.44 $\pm$ 0.01 def | 0.46 $\pm$ 0.02 de | 0.53 $\pm$ 0.01 b  |
| $\varphi_{Ro}$     | 0.10 $\pm$ 0.01 e  | 0.14 $\pm$ 0.01 d  | 0.15 $\pm$ 0.02 d  | 0.15 $\pm$ 0.00 d  | 0.24 $\pm$ 0.01 bc | 0.23 $\pm$ 0.00 c  | 0.22 $\pm$ 0.00 c   | 0.27 $\pm$ 0.01 b  | 0.32 $\pm$ 0.01 a  |
| $PI_{ABS}$         | 0.12 $\pm$ 0.02 f  | 0.95 $\pm$ 0.01 e  | 0.88 $\pm$ 0.03 e  | 1.84 $\pm$ 0.03 d  | 5.01 $\pm$ 0.08 c  | 6.08 $\pm$ 0.12 b  | 4.79 $\pm$ 0.27 c   | 7.87 $\pm$ 0.03 a  | 7.90 $\pm$ 0.21 a  |
| $PI_{total}$       | 0.55 $\pm$ 0.01 c  | 0.87 $\pm$ 0.01 d  | 0.88 $\pm$ 0.01 d  | 1.24 $\pm$ 0.06 d  | 4.46 $\pm$ 0.03 b  | 4.48 $\pm$ 0.17 b  | 3.66 $\pm$ 0.29 c   | 6.89 $\pm$ 0.47 a  | 6.85 $\pm$ 0.43 a  |

Note: In the same line, values with different letters are significantly different ( $P < 0.05$ ).
